# Supplementary material
Source: publisher figshare collection journal article supplement (https://frontiersin.figshare.com/ndownloader/files/28294980)
Supplement: Supplementary file [file 28294980]

## Supplementary Information 2

Results of mixed-effect models for vocal consistency without one clutch that appeared influential in scatterplots<sup>†</sup>

| Response                            | Social Father's phenotype | log(Age)          | Relatedness | Clutch   | Relatedness or Clutch |
|-------------------------------------|---------------------------|-------------------|-------------|----------|-----------------------|
| Note duration                       | 0.16<br>p=0.23            | -0.34<br>p=0.0022 | p=0.15      | p=0.30   | p=0.042               |
| Mean dominant frequency             | 0.34<br>p=0.033           | -0.17<br>p=0.15   | p>0.99      | p=0.036  | p=0.11                |
| Frequency change                    | 0.095<br>p=0.52           | -0.071<br>p=0.62  | p>0.99      | p=0.60   | p=0.87                |
| Dynamic time warping                | 0.25<br>p=0.17            | -0.055<br>p=0.28  | p>0.99      | p=0.0049 | p=0.019               |
| Spectral cross correlation (median) | 0.11<br>p=0.25            | -0.010<br>p=0.067 | p>0.99      | p=0.020  | p=0.039               |

<sup>†</sup>Vocal consistency was computed from a total of 17,594 (note duration, mean dominant frequency); 17,011 (frequency change); or 16,786 (dynamic time warping, spectral cross correlation) notes where the same note subtype appeared multiple times in the same song. For each vocal consistency measure, we studied data on 55 social father-son pairs.
